# Supplementary material for: Mediterranean diet adherence among women attending mobile breast cancer prevention program: results of a cross-sectional study in Italy
Source: Research Square preprint supplement (doi:10.21203/rs.3.rs-8099766/v1), 2025-12-17
Supplement: Supplementary file 1 [file 2e0db197fc708f0538797c43.docx]

**Additional File 3. Distribution of mammographic screening result from the “Prevention Caravan” across geographical area and breast cancer risk factor categories**

|  | **Screening result “*Prevention Caravan*”** | |
| --- | --- | --- |
|  | **No malignant lesion**  **(N = 735)** | **Malignant lesion**  **(N = 8)** |
|  | **N (%) or**  **Mean ± SD** | **N (%) or**  **Mean ± SD** |
| **Mammographic screening** |  |  |
| Breast ultrasound | 315 (42.86) | 0 |
| Mammography | 420 (57.14) | 8 (100.00) |
| *Missing* | *0* | *0* |
| **MEDAS score** |  |  |
| Low adherence | 605 (82.31) | 7 (87.50) |
| Good adherence | 130 (17.69) | 1 (12.50) |
| Excellent adherence | 0 | 0 |
| *Missing* | *0* | *0* |
| **Demographic characteristics** |  |  |
| Geographical area |  |  |
| Northern Italy | 71 (11.87) | 0 |
| Central Italy | 423 (70.74) | 4 (57.14) |
| Southern Italy | 86 (14.38) | 1 (14.29) |
| Islands Italy | 18 (3.01) | 2 (28.57) |
| *Missing* | *137 (18.44)* | *1 (0.13)* |
| Age (continuous) | 41.10 ± 8.65 | 47.75 ± 4.33 |
| Age (categorical) |  |  |
| ≤45 years | 457 (71.41) | 2 (25.00) |
| 46-74 years | 181 (28.28) | 6 (75.00) |
| ≥75 years | 2 (0.31) | 0 |
| *Missing* | *95 (12.79)* | *0* |
| **Gynecological history** |  |  |
| Menarche age (continuous) | 12.32 ± 1.46 | 13 ± 2 |
| Menarche age (categorical) |  |  |
| Early menarche (≤10 years) | 79 (10.87) | 2 (25.00) |
| Normal menarche (11-15 years) | 638 (87.76) | 6 (75.00) |
| Late menarche (≥16 years) | 10 (1.38) | 0 |
| *Missing* | *8 (1.08)* | *0* |
| Menstrual cycle |  |  |
| Regular | 550 (75.24) | 4 (50.00) |
| Irregular | 181 (24.76) | 4 (50.00) |
| *Missing* | *4 (0.54)* | *0* |
| Hormonal therapies |  |  |
| Never | 410 (56.09) | 4 (50.00) |
| In the past | 231 (31.60) | 1 (12.50) |
| Ongoing | 90 (12.31) | 3 (37.50) |
| *Missing* | *4 (0.54)* | *0* |
| Pregnancy |  |  |
| None | 314 (42.95) | 1 (12.50) |
| Yes | 417 (57.05) | 7 (87.50) |
| *Missing* | *4 (0.54)* | *0* |
| Breastfeeding |  |  |
| None | 53 (12.71) | 0 |
| Yes | 364 (87.29) | 7 (100.00) |
| *Missing* | *0* | *0* |
| Breastfeeding time |  |  |
| <6 months | 104 (28.57) | 1 (14.29) |
| 6-12 months | 134 (36.81) | 4 (57.14) |
| >12 months | 126 (34.62) | 2 (28.57) |
| *Missing* | *0* | *0* |
| Previous personal breast lesion |  |  |
| None | 665 (90.48) | 3 (37.50) |
| Benign | 58 (7.89) | 1 (12.50) |
| Malignant | 12 (1.63) | 4 (50.00) |
| *Missing* | *0* | *0* |
| Previous familial breast lesion |  |  |
| None | 456 (62.04) | 4 (50.00) |
| Benign | 279 (37.96) | 4 (50.00) |
| *Missing* | *0* | *0* |

**Abbreviations**

MEDAS = Mediterranean Diet Adherence Screener
