# Supplementary material for: Mediterranean diet adherence among women attending mobile breast cancer prevention program: results of a cross-sectional study in Italy
Source: Research Square preprint supplement (doi:10.21203/rs.3.rs-8099766/v1), 2025-12-17
Supplement: Supplementary file 2 [file a43658fc7dc56a0ff79f786c.docx]

**Additional File 2. Medical history questionnaire**

Date of last mammogram: ____ / ____ / ________

Date of last breast ultrasound: ____ / ____ / ________

Breastfeeding: □ Yes □ No

Currently breastfeeding: □ Yes □ No

For how long have you breastfed? __________

Family history of breast cancer: □ Yes □ No

Degree of kinship: ____________________

Age at diagnosis: ______

Age at menarche: __________ Last Menstrual Period/Menopause: _____________

Pregnancies: __________________

Hormonal therapy/HRT: □ Ongoing □ Never taken □ In the past

Previous breast disease:

□ Malignant □ Right □ Left

□ Benign □ Right □ Left

Age at diagnosis: __________

Previous breast surgery:

____________________________________________________

Other procedures (if any):

____________________________________________________

Have you ever participated in Komen Italia screenings? □ Yes □ No
