# Supplementary material for: Mediterranean diet adherence among women attending mobile breast cancer prevention program: results of a cross-sectional study in Italy
Source: Research Square preprint supplement (doi:10.21203/rs.3.rs-8099766/v1), 2025-12-17
Supplement: Supplementary file 3 [file be83e21d7f88d7e41cba5d67.docx]

**Additional File 1. Mediterranean Diet Adherence Questionnaire (MEDAS)**

|  | **Questions** | **Answers** | **Points** |
| --- | --- | --- | --- |
| 1 | Do you mainly use olive oil/extra virgin olive oil for cooking? | Yes (1) No (0) |  |
| 2 | How much olive oil do you consume per day (including cooking)? | 4 or more tablespoons (1) Less than 4 tablespoons (0) |  |
| 3 | How many servings of vegetables do you consume daily? (1 serving = 200 g) | 2 or more servings (1) Less than 2 servings (0) |  |
| 4 | How many servings of fruit do you consume daily? | 3 or more servings (1) Less than 3 servings (0) |  |
| 5 | How many servings of red meat/sausages/ham do you consume per week? (1 meat serving = 100–150g – 1 ham serving = 70g) | Less than 3 servings per week (1) 3 or more servings (0) |  |
| 6 | How much butter/margarine/cream do you consume per day? (1 serving = 12 g) | Less than 1 serving (1) 1 or more servings (0) |  |
| 7 | How many glasses of sugary drinks do you consume per day? (1 glass = 125 ml) | Less than 1 glass (1) 1 or more glasses (0) |  |
| 8 | How many servings of legumes do you consume per week? | 3 or more servings (1) Less than 3 servings (0) |  |
| 9 | How many servings of fish do you consume per week? (1 serving = 100–150 g) | 2 or more servings (1) Less than 2 servings (0) |  |
| 10 | How many times a week do you consume baked goods (cakes, brioches, cookies…), excluding homemade products? | Less than 3 times (1) 3 or more times (0) |  |
| 11 | How many servings of nuts do you consume per week? (1 serving = 30 g) | 1 or more servings (1) None (0) |  |
| 12 | Do you mainly consume white meat (chicken/turkey/rabbit) instead of red meat and sausages? | Yes (1) No (0) |  |
| 13 | How many times a week do you eat dishes with tomato sauce made with olive oil/onion/garlic? | 2 or more times (1) Less than 2 times (0) |  |
| **Total score** | | |  |
